# Supplementary material
Source: publisher figshare collection journal article supplement (https://sage.figshare.com/ndownloader/files/14579402)
Supplement: Supplementary file 2 [file 14579402]

## **Replication Instructions for “Path Dependence in European Development: Medieval Politics, Conflict and State Building” by Avi Acharya & Alex Lee.**

(Note: Figure 1 was created using ArcGIS and is simply a visual depiction of the percent male variable created in the replication below, so it is omitted. Figure A.1 and the List of Succession Related Wars, both the appendix, are tabulations of data from other sources, so they are not part of the replication here. The file “findings.csv” contains the numbers depicted in Figure A.1.)

### **9-23-cross-section-module:**

To run this module, first run all of “9-23-cross-section-first-collapse.do” and then all of “9-23-cross-section-extra-collapse.do.”

Then open “9-23-cross-section-module.do” This module produces:

- Figure 2 in the main text
- Table 1 in the main text, and all the analyses mentioned in Section 5.1.
- The illegitimate children placebo test mentioned in Section 5.4
- Table 2 in Section 6.1.
- Table 3 columns (1) and (2) in Section 6.2.
- Table 4 in Section 6.2.
- Table 6 in the main text, and statistics on women rulers mentioned in Section 6.3
- The cross-sectional analysis on primogeniture mentioned in Section 6.4
- Appendix Table A.0
- Appendix Table A.1
- Appendix Table A.4, and the “Treatment units” analysis mentioned in Section A.4
- Appendix Table A.5, columns (1) - (6) and the analysis that removes regions east of the Elbe, mentioned in Section A.5, footnote 1. [To generate columns (7) and (8) respectively include lines 90-91 and 93-94 of “9-23-cross-section-extra-collapse.do” in separate fresh runs of the collapse, then run the specification for column (5) of Table 1 in “9-23-cross-section-module.do”.]
- The estimates of Section A.6 on Multiple Male Heirs

### **9-23-panel-module:**

To run this module, first run all of “9-23-panel-first-collapse.do.”

Then open “9-23-panel-module.do” This module produces:

- Table 3, columns (3) and (4) in the monarch-level and region-level analyses.
- The estimates reported in footnote 31 of Section 6.2 of the paper.
- The panel estimates on primogeniture adoption reported in Section 6.4 of the paper.

**stopping-rules.do:**

No collapse is necessary to run this. The file produces:

- Table A.2 in the Appendix.

**deletions-sensitivity.do**

To run this module, first run the collapse files. The file produces:

- the sensitivity analysis reported in the final paragraph of Section 5.4.

**KS-tests.do**

To run this module, first run the collapse files. The file produces:

- the results of the KS tests described in Section 5.5
- Figure A.0 in the Appendix

**table5.do**

This file creates a dataset corresponding to:

- Table 5 in Section 6.2 of the paper.

**snapshots.do**

This file produces:

- the results of Table A.3 in the appendix.
